# Supplementary material
Source: PubMed Central journal article supplement (PMC3117635)
Supplement: NIHMS294815-supplement-01.pdf [file NIHMS294815-supplement-01.pdf]

**KPom1 DNA Sequence:**

5'-ATGGCGTTTGAATACTTCGAGTCTAAAAAGAAGTTCGATGACGATATCGAAAGCCGTTTCT  
TCATCATCAATGATAACAACACTACAACGAGAACATCAATCTGATTTACAAAGATATCAAATACTG  
CGGTCTGGATATTGAAACCACCGGCCTGGAGGTATTTGACGAAAACATTCGCCTGATTCAA  
TCGCAGTTGAAAACACCCGGTGATCATCTACGACATGTTTAACATCAACAAGAAAGATATTC  
TGGACGGCCTGCGTAAAGTTCTGGAAAACAAAAACATTATCAAAATCATTTCAGAACGGCAA  
TTCGACGCAAAATTTCTGCTGCACAACAACCTTCAAATCGAAAACATTTTCGACACCTATATT  
GCATCCAAACTGCTGGATAAGAACAACAAACATGTATGGTTTCAAACCTGAACAACATCGTAGAA  
AAATATCTGAATGTAATTCTGGATAAACAGCAGCAGAATTCTGTTTGAACAACCTCTCTGCTG  
AACACAATCAGCTGTTTTACGCAGCTCGTGACTCCTCTTGCTGCTGAAACTGTATAAAAAG  
CTGAAGGAAGAAATCAAGAAAGAAAACCTGCACATTGTAATGACATCGAAAACAAATGCAT  
CCTGCCGATCTGTGATATGGAACCTGAACGGTATCAAAGTTGATCTGGAAAACCTGCAGAAAT  
CCACCAACGAAATTCTGAACGAACTGAACATCGAGAAAGATAACCTGAAAAAGAACTGAAA  
GACGAAAACATCAATGTTAATAGCCAGCAGCAAGTCTGAAAGCGCTGCAGAAGAACAATGT  
CCGTGACATCTCTAACAAACTGATCGAAAATACCTCCGATTCTAATCTGAAAAACTTTCTGAA  
TACGAAGAGATCATTCTCTGCGTAACTACCGTCGCCTGTACAAACTGACTCTGCTTTCTA  
TCTGAAACTGCCGCTGCACATTAACACCAAGACTAACAAAATTTCACACCACCTTCAACCAGC  
TGAAAACCTTCTCCGGTCTGTTTCAGCTCTGAAAAGCCGAACCTGCAGCAGATCCCGCGTCAA  
AAGAACATCCGCGAAATTTTCATTCCGAACGATAACAACATCTTCATCATTGCAGATTTCAA  
CAGATCGAACTGAAAATCGCGGCGGAAATCACCAACGACGAAATTATGCTGAAAGCCTATAA  
CAACAACATCGACCTGCATACGCTGACCGCCTCTATCATCACTAAGAAGAACATCCCGGATA  
TCAACAAAGAAGATCGTCATATTGCTAAGGCTATTAACCTTTGGTCTGATTTACGGCATGAACT  
ACGTCAACCTGAAAAACTACGCGAACACCTACTACGGTCTGAACATGTCTCTGGATCAGTGC  
CTGACTTCTATAACAGCTTCTTTGAACACTATAAAGGCATCTACAAATGGCACAACCAGGTA  
AAACAGAAACGCGCGCTGCAGTACTCCACTCTGAGCAACCGTAAAGTTATCTTCCCGTATTT  
TTCTTTTACCAAAGCGCTGAACTATCCGGTCCAGGGTACGTGCGCAGACATCCTGAAACTGG  
CACTGGTGGATCTGTATGACAACCTGAAAGATATCAACGGTAAATCATCCTGTGTGTACAC  
GACGAGATTATCATTGAAGTTAACAAAAAGTTTCAGGAGGAAGCACTGAAGATCCTGGTACA  
GTCTATGGAAAACCTCTGCTTCTTATTTTCTGAAAAGGTCAAATGCGAAGTTTCTGTCAAAT  
CGCAGAAAACCTGGGGTTCCAAAGACTAA-3'

**KPom1 amino acid sequence:**

MAFEYFESKKKFDDDDIESRFFIINDNNYNENINLIYKDIKYCGLDIETTGLEVFDENIRLIQIAVENYP  
VIIYDMFNINKKDILDGLRKVLENKNIKIIQNGKFDKFLHNNFKIENIFDITYASKLLDKNKNMYGF  
KLNNIVEKYLNVILDKQQQNSVWNNSSLNQLFYAARDSSCLLKLYKKLKEEIKKENLHIVNDIEN  
KCILPICDMELNGIKVDLENLQKSTNEILNELNIEKDNLKKLKDENINVNSQQQVLKALQKNNVRD  
ISNKLIENTS SDSNLKNFLNHEEIIISLRNYRRLYKLYSAFYLLKPLHINTKTNKIHTTFNQLKTFSGRFS  
SEKPNLQQIPRQKNIREIFIPNDNNIFIADFKQIELKIAAEITNDEIMLKAYNNNIDLHTLTASIIKKNI  
PDINKEDRHIKAINFGLIYGMNYVNLKNYANTYYGLNMSLDQCLYFYNSFFEYHYKGIYKWHNQV  
KQKRALQYSTLSNRKVIFPYFSFTKALNYPVQGTCADILKLALVDLYDNLKDKINGKILCVHDEIIIIEV  
NKKFQEEALKILVQSMENSASYFLKKVKCEVSVKIAENWGSKD\*
