# Supplementary material
Source: PubMed Central journal article supplement (PMC3117635)

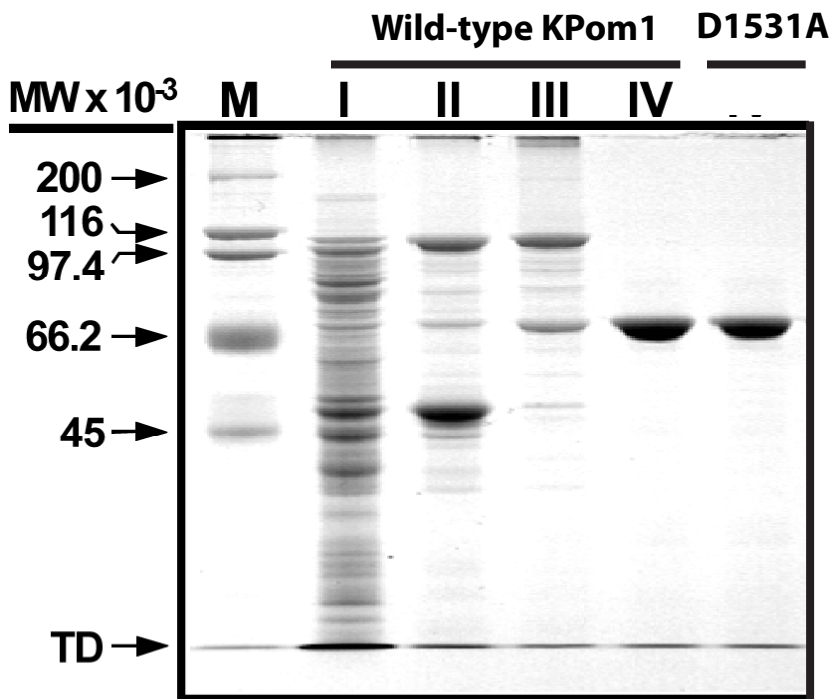

Supplement: NIHMS294815-supplement-02.pdf [file NIHMS294815-supplement-02.pdf]

**A**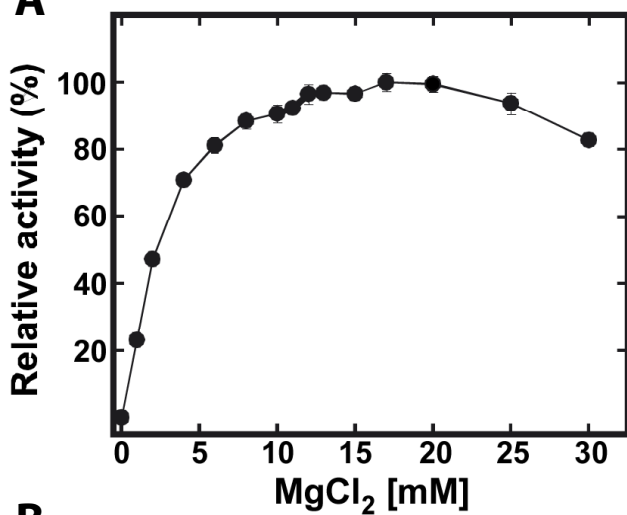**B**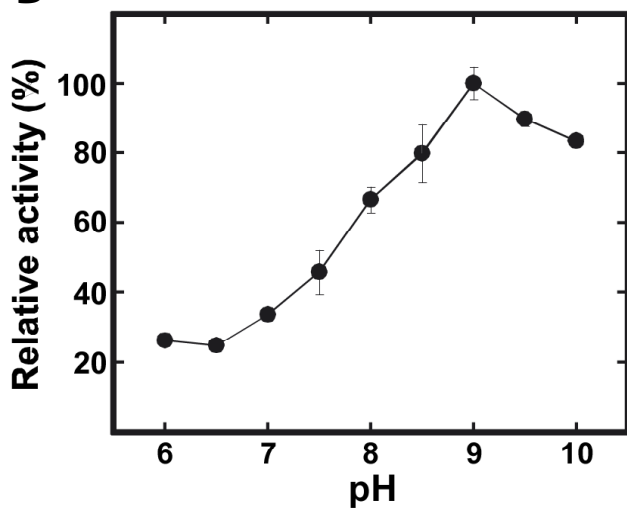**C**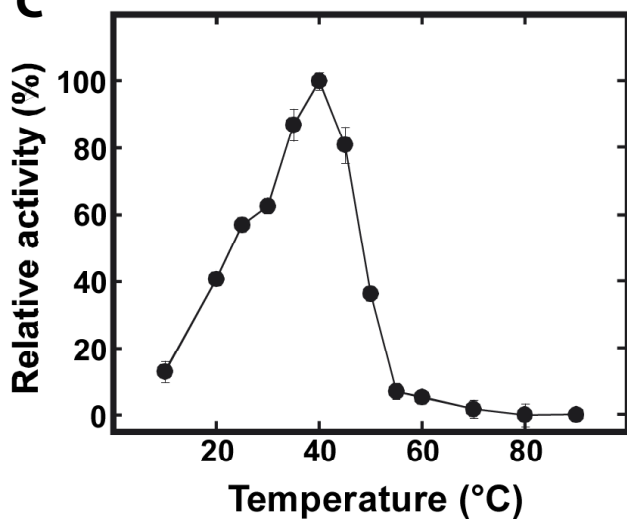

Supplement: NIHMS294815-supplement-03.pdf [file NIHMS294815-supplement-03.pdf]
